# Supplementary material
Source: PubMed Central journal article supplement (PMC6146982)
Supplement: zam019188778s1.pdf [file zam019188778s1.pdf]

## Supplementary information

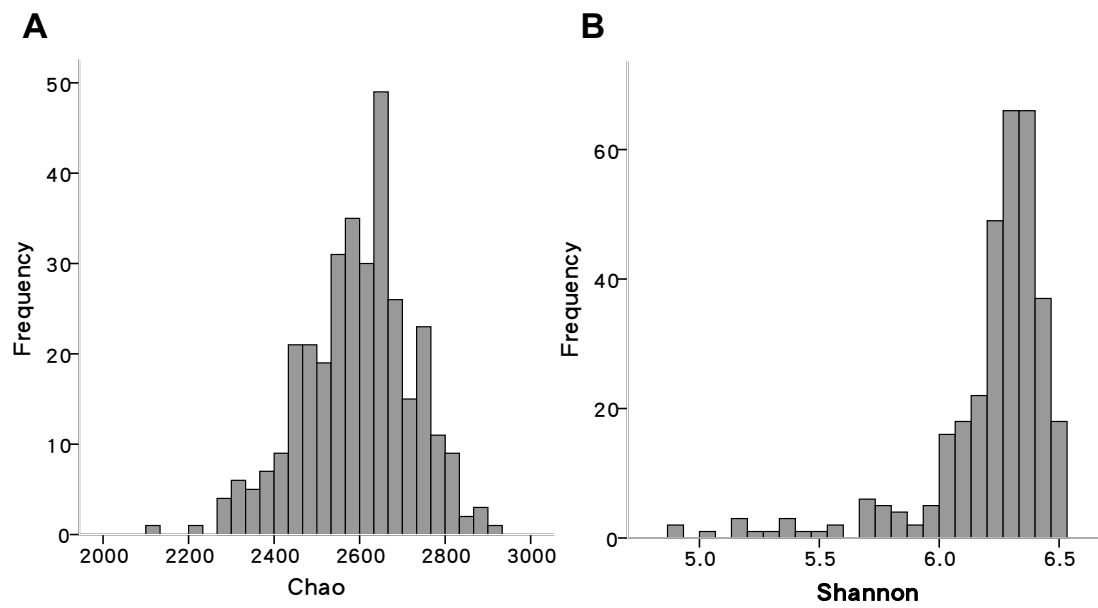

**Fig. S1.** Alpha diversity indexes of rumen bacterial microbiota of all 334 dairy cows. (A) Distribution of Shannon diversity index. (B) Distribution of Chao richness index.

**A**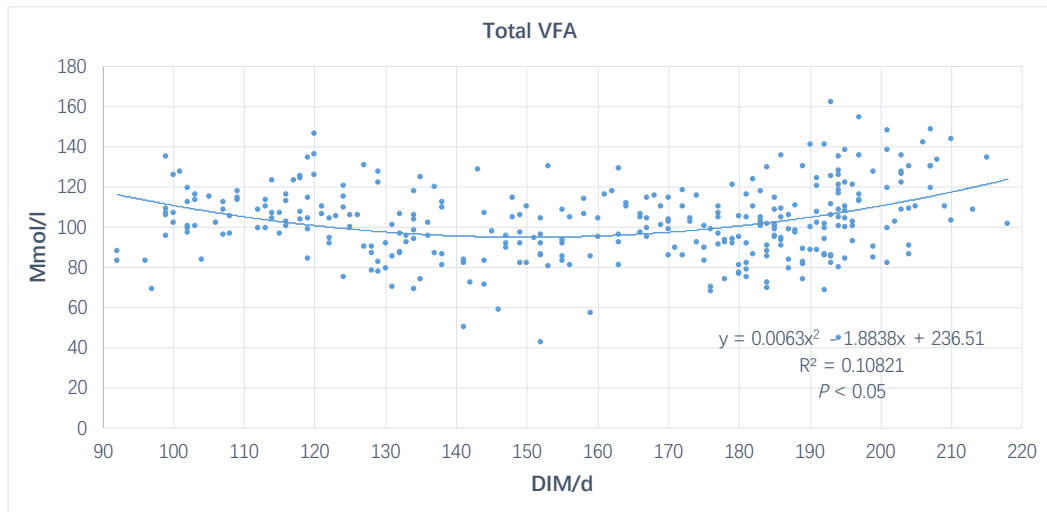**B**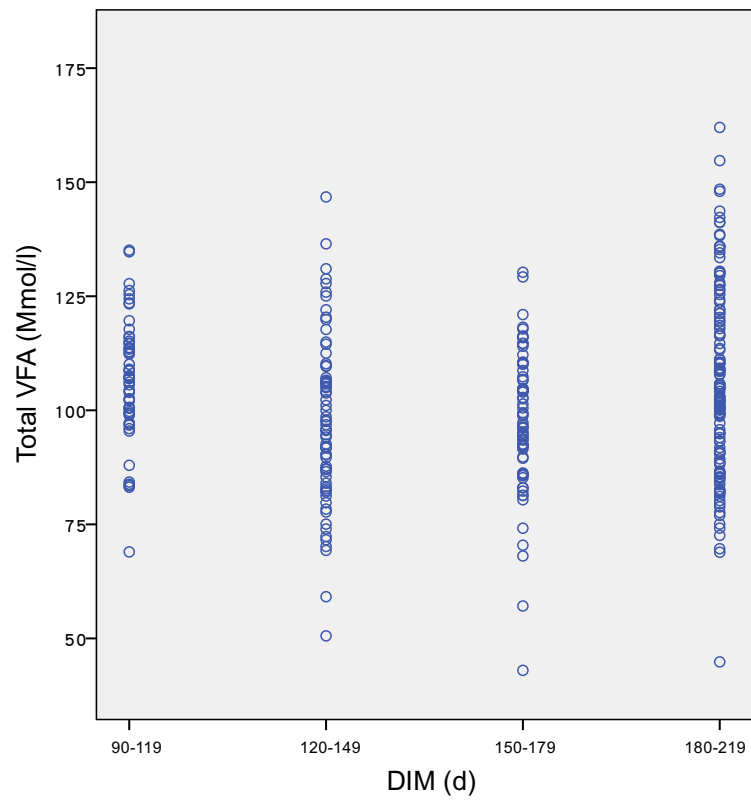

**Fig. S2.** Relationships between total VFA and lactation stage. (A) Scatter plot of total VFA related to different days in milk (DIM). (B) Distribution of total VFA concentrations in DIM groups.

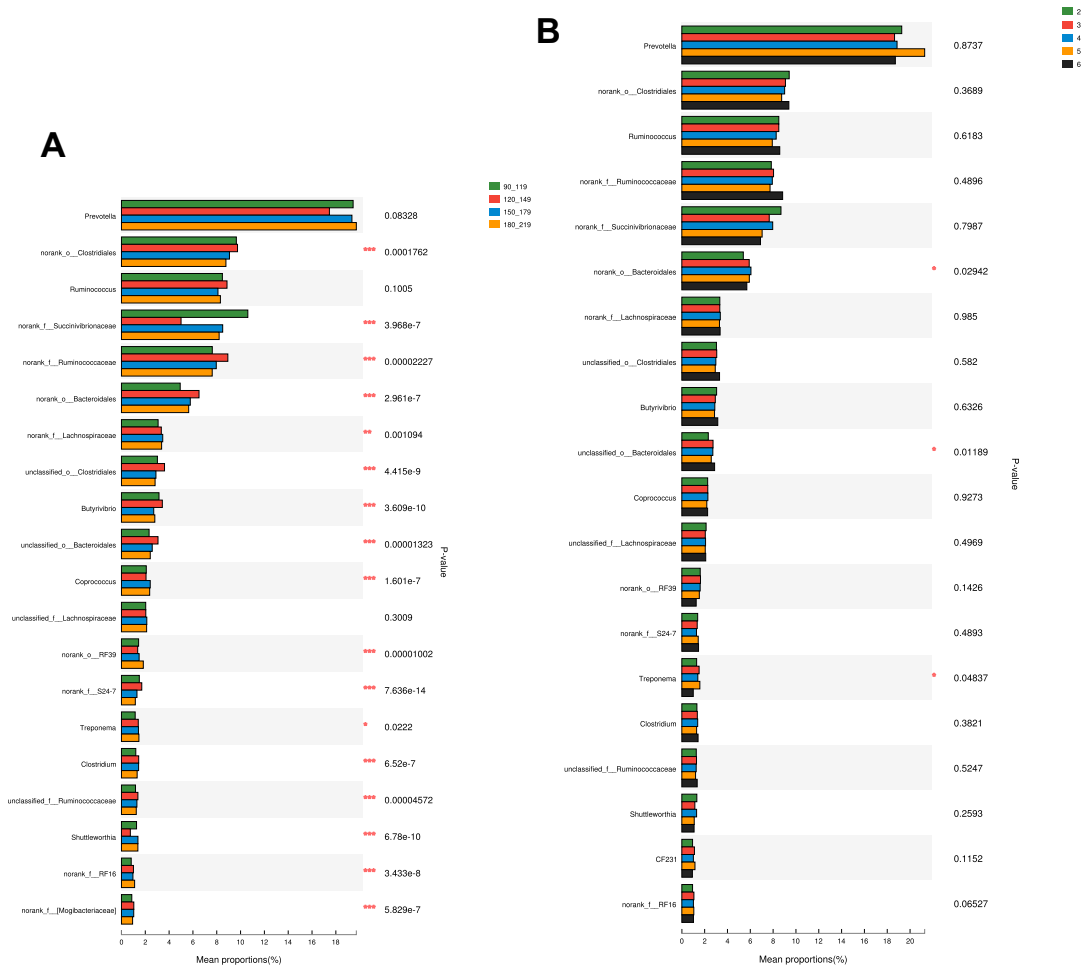

**Fig. S3.** Relative abundances of predominant genera between cows from different DIM groups (A) and parity groups (B). \* $P < 0.05$ , \*\* $P < 0.01$ , \*\*\* $P < 0.001$ .

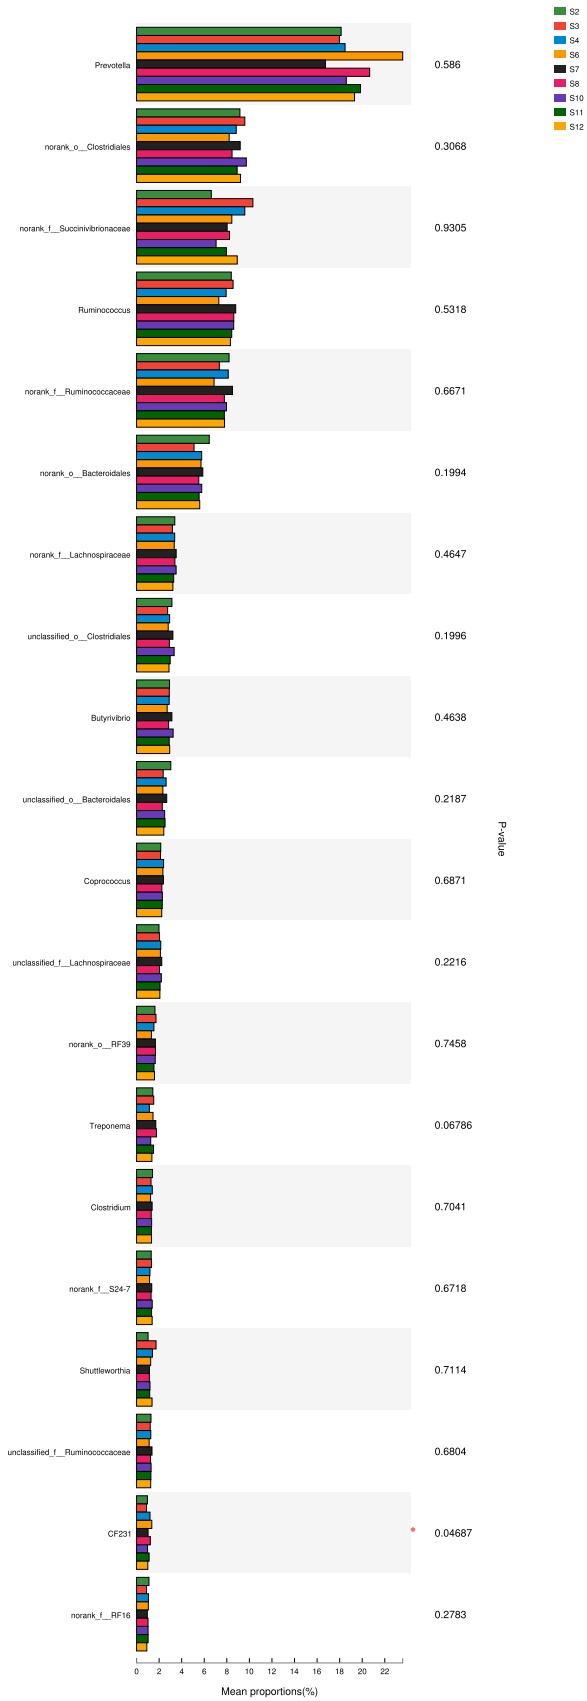

**Fig. S4.** Relative abundances of predominant genera between cows from different sire groups.

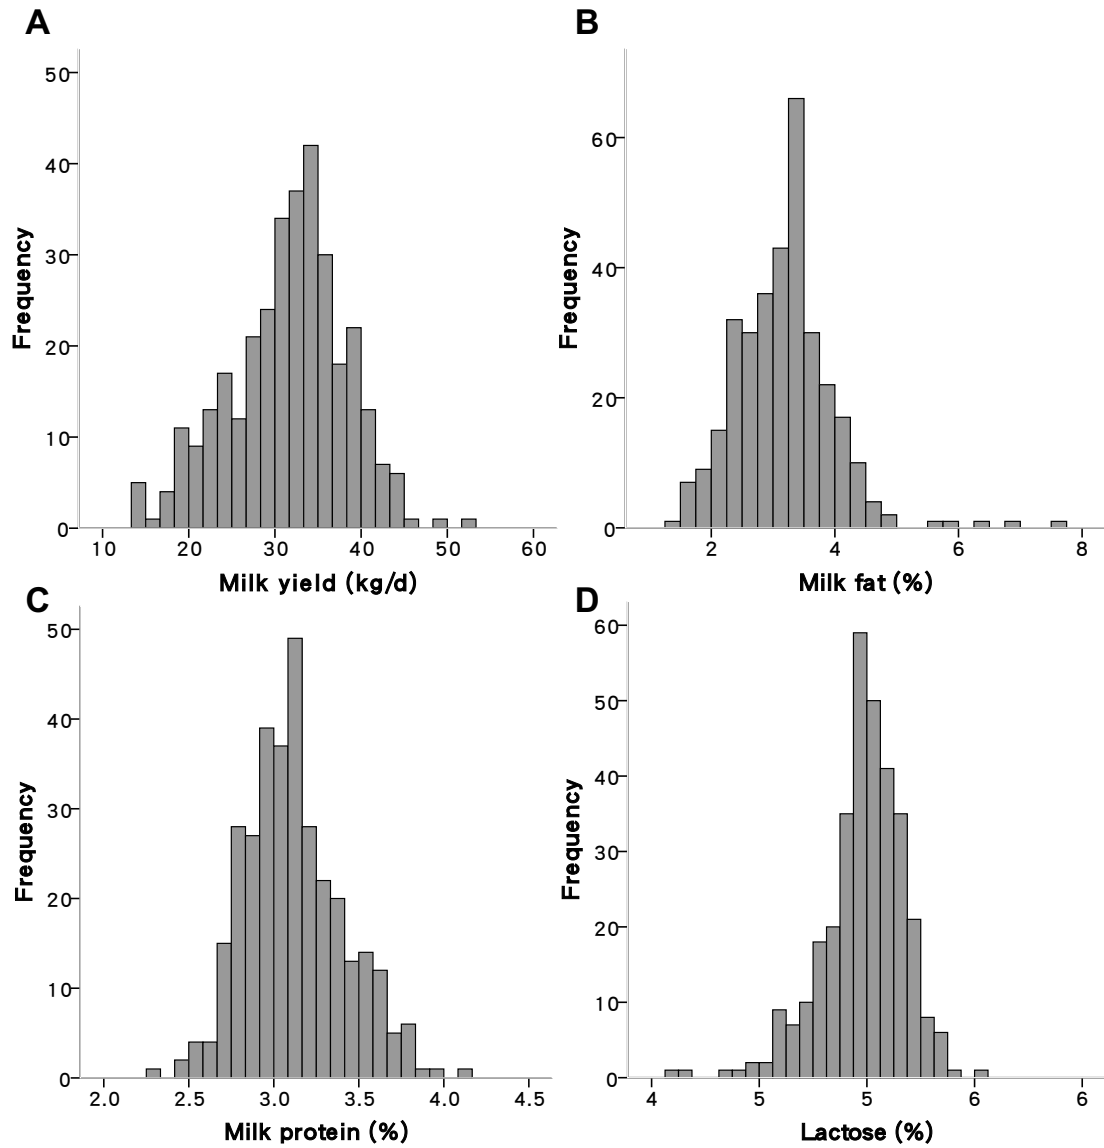

**Fig. S5.** Distributions of milk yield (A), milk fat (B), milk protein (C) and lactose (D).

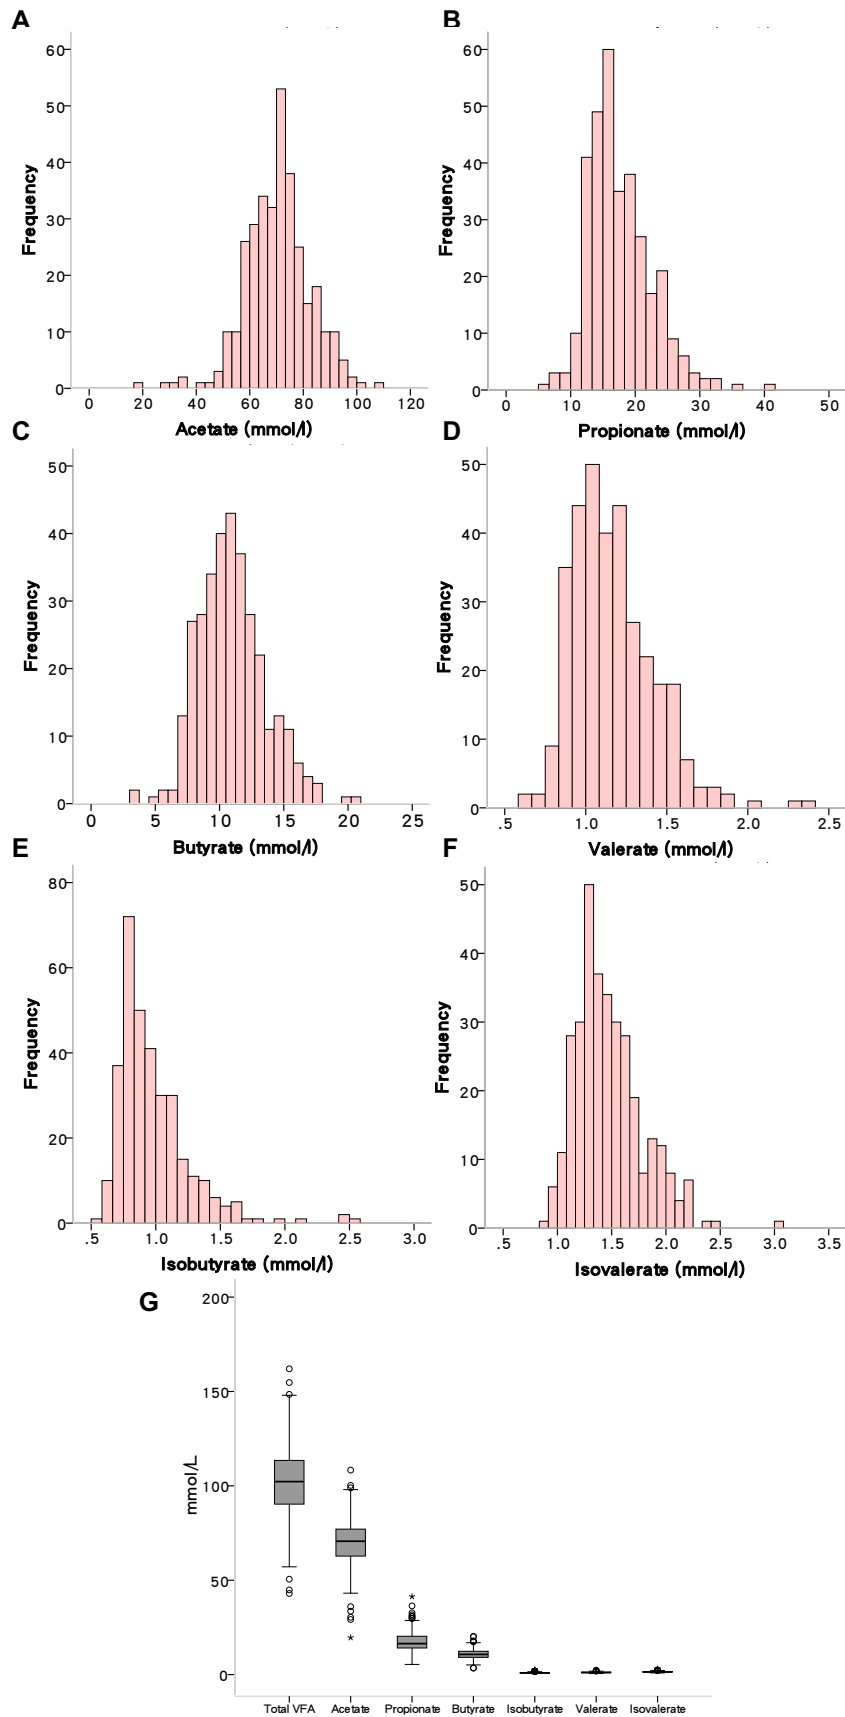

**Fig. S6.** Distributions of Acetate (A), Propionate (B), Butyrate (C), Valerate(D), Isobutyrate (E) and Isovalerate (F). Boxplot shows concentrations of total VFA, acetate,

propionate, butyrate, isobutyrate, valerate and isovalerate (G).

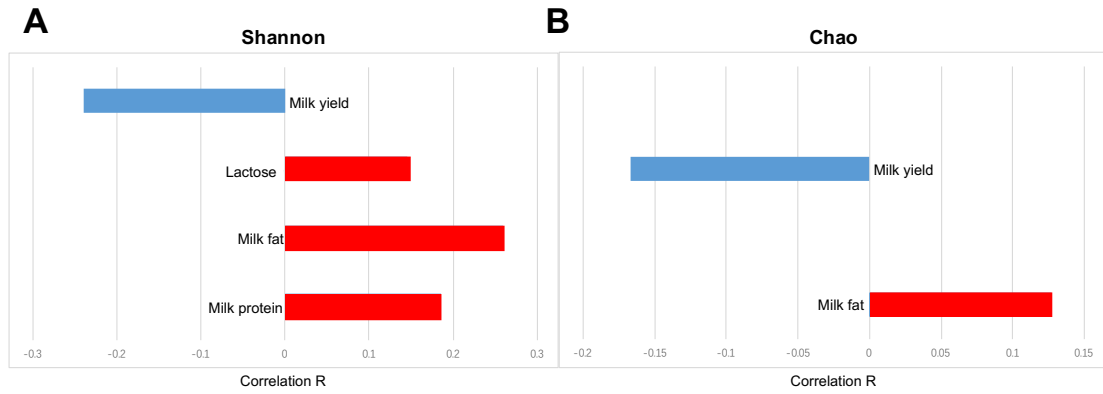

**Fig. S7.** Milking performance associated with Alpha diversity indexes. (A) Spearman correlation coefficients of milking performance correlated with Shannon index. (B) Spearman correlation coefficients of milking performance correlated with Chao index. Only significant correlations ( $P < 0.05$ ) were presented.



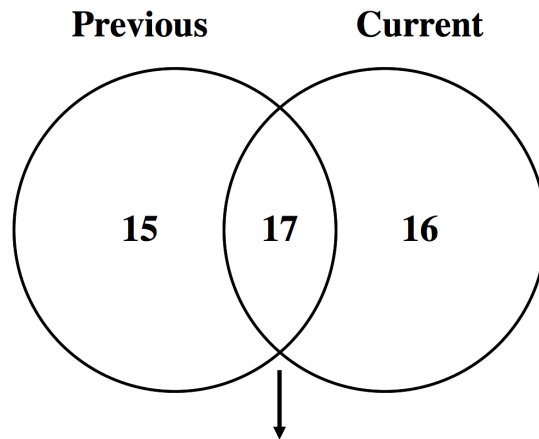

| 15 taxa included exclusively in previous study | 16 taxa included exclusively in current study | 17 taxa included in two studies |
|------------------------------------------------|-----------------------------------------------|---------------------------------|
| Atopobium                                      | Treponema                                     | p-75-a5                         |
| Adlercreutzia                                  | CF231                                         | Bulleidia                       |
| *Coriobacteriaceae                             | Fibrobacter                                   | Desulfovibrio                   |
| *Coriobacteriales                              | YRC22                                         | Selenomonas                     |
| *F16                                           | Anaerostipes                                  | Succinielasticum                |
| *YS2                                           | Anaeroplasma                                  | Ruminococcus                    |
| *Aeromonadales                                 | RFN20                                         | Oscillospira                    |
| Mitsuokella                                    | Succinivibrio                                 | Shuttleworthia                  |
| *Ruminococcaceae                               | Ruminobacter                                  | Roseburia                       |
| Lachnobacterium                                | L7A_E11                                       | Pseudobutyrvibrio               |
| Eubacterium                                    | Anaerovibrio                                  | Moryella                        |
| *Lachnospiraceae                               | *Lachnospiraceae                              | Lachnospira                     |
| *Clostridiales Family XIII                     | Schwartzia                                    | Coprococcus                     |
| *Clostridiales                                 | BF311                                         | Clostridium                     |
| *Bacteroidales                                 | Mogibacterium                                 | Butyrvibrio                     |
|                                                | Oribacterium                                  | Blautia                         |
|                                                |                                               | Prevotella                      |

\*Taxa not identified at the genus level were shown at their highest taxonomic identified level.

**Fig. S8.** Shared and specific core bacteriome between study by Jami and Mizrahi (E. Jami, and I. Mizrahi, PLoS ONE 7(3): e33306, 2012, doi:10.1371/journal.pone.0033306) and the current study.

**Table S3 Milking performance and rumen fermentation in different lactation stage groups.**

| Items               | Mean   |         |         |         | SEM  | <i>P</i> |
|---------------------|--------|---------|---------|---------|------|----------|
|                     | 90-119 | 120-149 | 150-179 | 180-219 |      |          |
| ECM (Kg)            | 32.72  | 32.93   | 29.17   | 29.27   | 0.33 | ***      |
| Milk yield (Kg)     | 34.52  | 32.67   | 29.93   | 30.18   | 0.37 | ***      |
| Milk protein (%)    | 2.95   | 3.13    | 3.13    | 3.19    | 0.02 | ***      |
| Milk fat (%)        | 3.06   | 3.39    | 3.18    | 3.17    | 0.05 | NS       |
| Total VFA (mmol/l)  | 106.97 | 97.62   | 97.75   | 106.15  | 1.01 | ***      |
| Acetate (mmol/l)    | 71.72  | 68.22   | 67.51   | 72.72   | 0.66 | **       |
| Propionate (mmol/l) | 19.56  | 15.46   | 17.00   | 18.19   | 0.27 | ***      |
| Butyrate (mmol/l)   | 12.01  | 10.49   | 9.81    | 11.44   | 0.14 | ***      |

\*\*  $P < 0.01$ ; \*\*\*  $P < 0.001$ . By One-way ANOVA.

**Table S4 Numbers of cows which were in the same parity, days in milk (DIM), sire and dam subgroups.**

| Parity | Numbers | DIM     | Numbers | Sire | Numbers |
|--------|---------|---------|---------|------|---------|
| 2      | 124     | 90-119  | 56      | S1   | 5       |
| 3      | 107     | 120-149 | 73      | S2   | 26      |
| 4      | 62      | 150-179 | 72      | S3   | 14      |
| 5      | 24      | 180-219 | 132     | S4   | 17      |
| 6      | 15      |         |         | S5   | 6       |
| 7      | 2       |         |         | S6   | 11      |
|        |         |         |         | S7   | 21      |
|        |         |         |         | S8   | 18      |
|        |         |         |         | S9   | 9       |
|        |         |         |         | S10  | 34      |
|        |         |         |         | S11  | 28      |
|        |         |         |         | S12  | 73      |
|        |         |         |         | S13  | 9       |
|        |         |         |         | S14  | 3       |

**Table S6 Spearman correlation coefficients between milking performance and rumen fermentation products.**

|             | Milk yield | Milk fat | Milk protein | Lactose | Milk protein yield |
|-------------|------------|----------|--------------|---------|--------------------|
| VFAs        |            |          |              |         |                    |
| Acetate     | -0.316     | 0.264    |              |         | -0.291             |
| Propionate  | 0.314      | -0.312   | -0.153       |         | 0.267              |
| Butyrate    |            |          | 0.161        |         |                    |
| Isobutyrate | -0.214     | 0.149    |              |         | -0.207             |
| Valerate    | 0.225      | -0.205   | -0.129       |         | 0.187              |
| Isovalerate |            |          |              | -0.113  |                    |

Only significant ( $P < 0.05$ ) correlations were shown in the table.

**Table S7 Spearman correlation coefficients between rumen fermentation products and bacterial genera.**

| Taxa                   | Acetate | Propionate | Butyrate | Isobutyrate | Valerate | Isovalerate |
|------------------------|---------|------------|----------|-------------|----------|-------------|
| Prevotella             | 0.218   |            | 0.221    |             |          |             |
| Shuttleworthia         | 0.244   | 0.554      | 0.299    |             | 0.530    | 0.395       |
| Lachnospira            | 0.208   | 0.498      | 0.296    |             | 0.487    | 0.329       |
| Succinivibrio          | 0.219   |            |          |             |          |             |
| Selenomonas            | 0.216   |            | 0.223    |             |          |             |
| f__Succinivibrionaceae | 0.428   |            |          |             | 0.334    | 0.216       |
| f__Ruminococcaceae     |         | -0.256     |          |             | -0.228   |             |
| Butyrivibrio           |         | -0.253     |          |             |          |             |
| o__Bacteroidales       |         | -0.477     |          |             | -0.428   | -0.286      |
| o__Clostridiales       |         | -0.224     | 0.203    |             |          |             |
| Clostridium            |         | -0.241     |          |             | -0.246   |             |
| p__SR1                 |         | -0.209     | -0.229   |             | -0.225   | -0.213      |
| Fibrobacter            |         | -0.241     | -0.227   |             | -0.304   |             |
| f__Mogibacteriaceae    |         | -0.263     |          | 0.208       | -0.227   |             |
| YRC22                  |         | -0.220     |          |             |          |             |
| Moryella               |         | -0.210     |          |             |          |             |
| CF231                  |         |            |          | 0.260       |          | 0.267       |
| f__Christensenellaceae |         | -0.458     |          |             | -0.414   |             |
| Anaerostipes           |         |            | 0.222    |             |          |             |

Only significant ( $P < 0.05$ ) correlations with R value  $> 0.2$  were shown in the table.

**Table S8 Spearman correlation coefficients between milking performance and bacterial genera.**

| Taxa                   | Milk yield | Milk fat | Milk protein | Lactose |
|------------------------|------------|----------|--------------|---------|
| f__Christensenellaceae | -0.186     | 0.237    |              | 0.123   |
| o__Bacteroidales       | -0.229     | 0.226    |              |         |
| Moryella               | -0.142     | 0.211    |              |         |
| f__Mogibacteriaceae    | -0.225     | 0.169    |              |         |
| f__Ruminococcaceae     | -0.185     | 0.190    |              |         |
| Clostridium            | -0.149     | 0.153    |              |         |
| f__Succinivibrionaceae | 0.172      | -0.258   |              |         |
| Lachnospira            | 0.161      | -0.219   | -0.110       |         |
| CF231                  | -0.207     |          | 0.212        |         |
| Succinivibrio          | -0.218     |          |              |         |
| YRC22                  | -0.145     |          |              |         |
| f__RF16                | -0.120     |          |              |         |
| f__Lachnospiraceae     | -0.131     |          |              |         |
| Fibrobacter            | -0.120     |          |              |         |
| Selenomonas            | -0.150     |          |              | -0.108  |
| Shuttleworthia         |            | -0.201   |              | -0.163  |
| o__Clostridiales       |            | 0.181    |              | 0.115   |
| Butyrivibrio           |            | 0.163    |              | 0.125   |
| Treponema              |            | -0.149   |              |         |
| Pseudobutyrvibrio      |            | 0.121    |              |         |
| f__S24-7               |            | 0.131    |              |         |
| p-75-a5                |            |          | 0.110        |         |
| f__Prevotellaceae      |            |          | 0.144        |         |

Only significant ( $P < 0.05$ ) correlations with R value  $> 0.2$  were shown in the table.
